# Supplementary material
Source: Springer Nature journal article supplement (https://www.springermedizin.de/resource/supplementary/12889_2005_288_MOESM2_ESM.pdf/9500532)

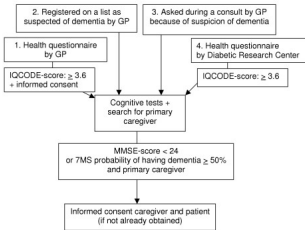

Supplement: MOESM2 [file 9500532]
